# Supplementary material for: Effect of 90Sr internal emitter on gene expression in mouse blood
Source: PubMed Central journal article supplement (PMC4528784; doi:10.1186/s12864-015-1774-z), 2015-08-07
Supplement: 12864_2015_1774_MOESM1_ESM.pdf [file 12864_2015_1774_MOESM1_ESM.pdf]

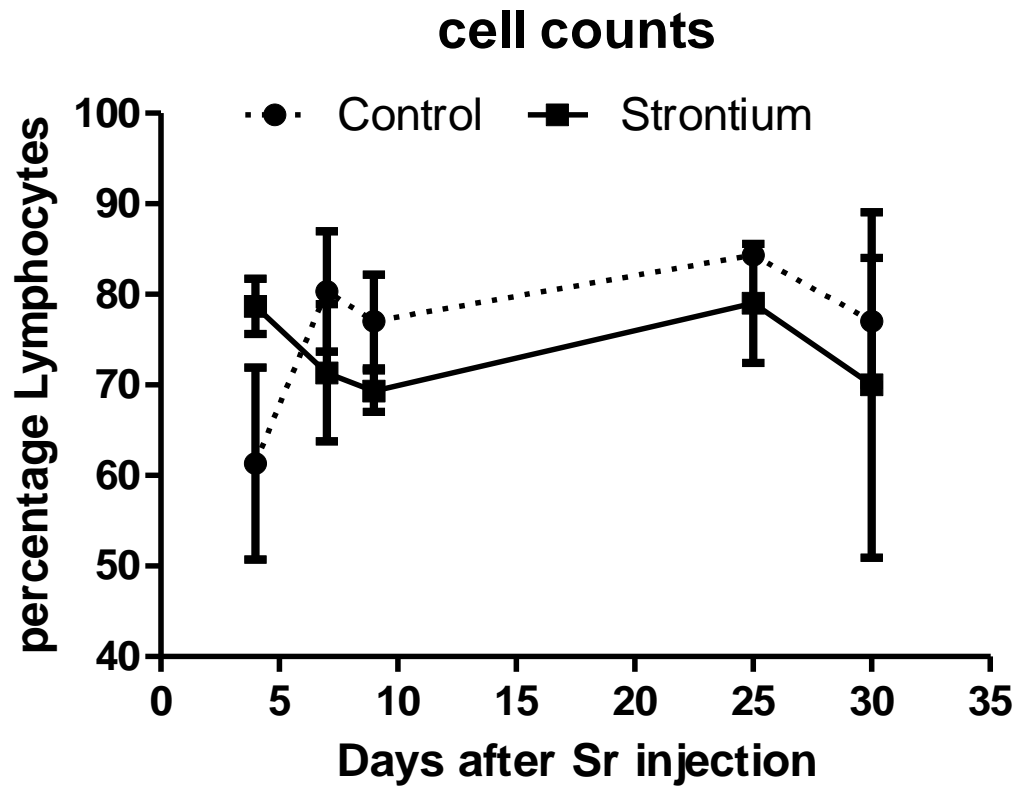

Additional file1. Blood smears were prepared at LRRRI and then stained with DiffQuick and manually counted.
