# Supplementary material for: Effect of 90Sr internal emitter on gene expression in mouse blood
Source: PubMed Central journal article supplement (PMC4528784; doi:10.1186/s12864-015-1774-z), 2015-08-07
Supplement: 12864_2015_1774_MOESM7_ESM.pdf [file 12864_2015_1774_MOESM7_ESM.pdf]

# Day 4

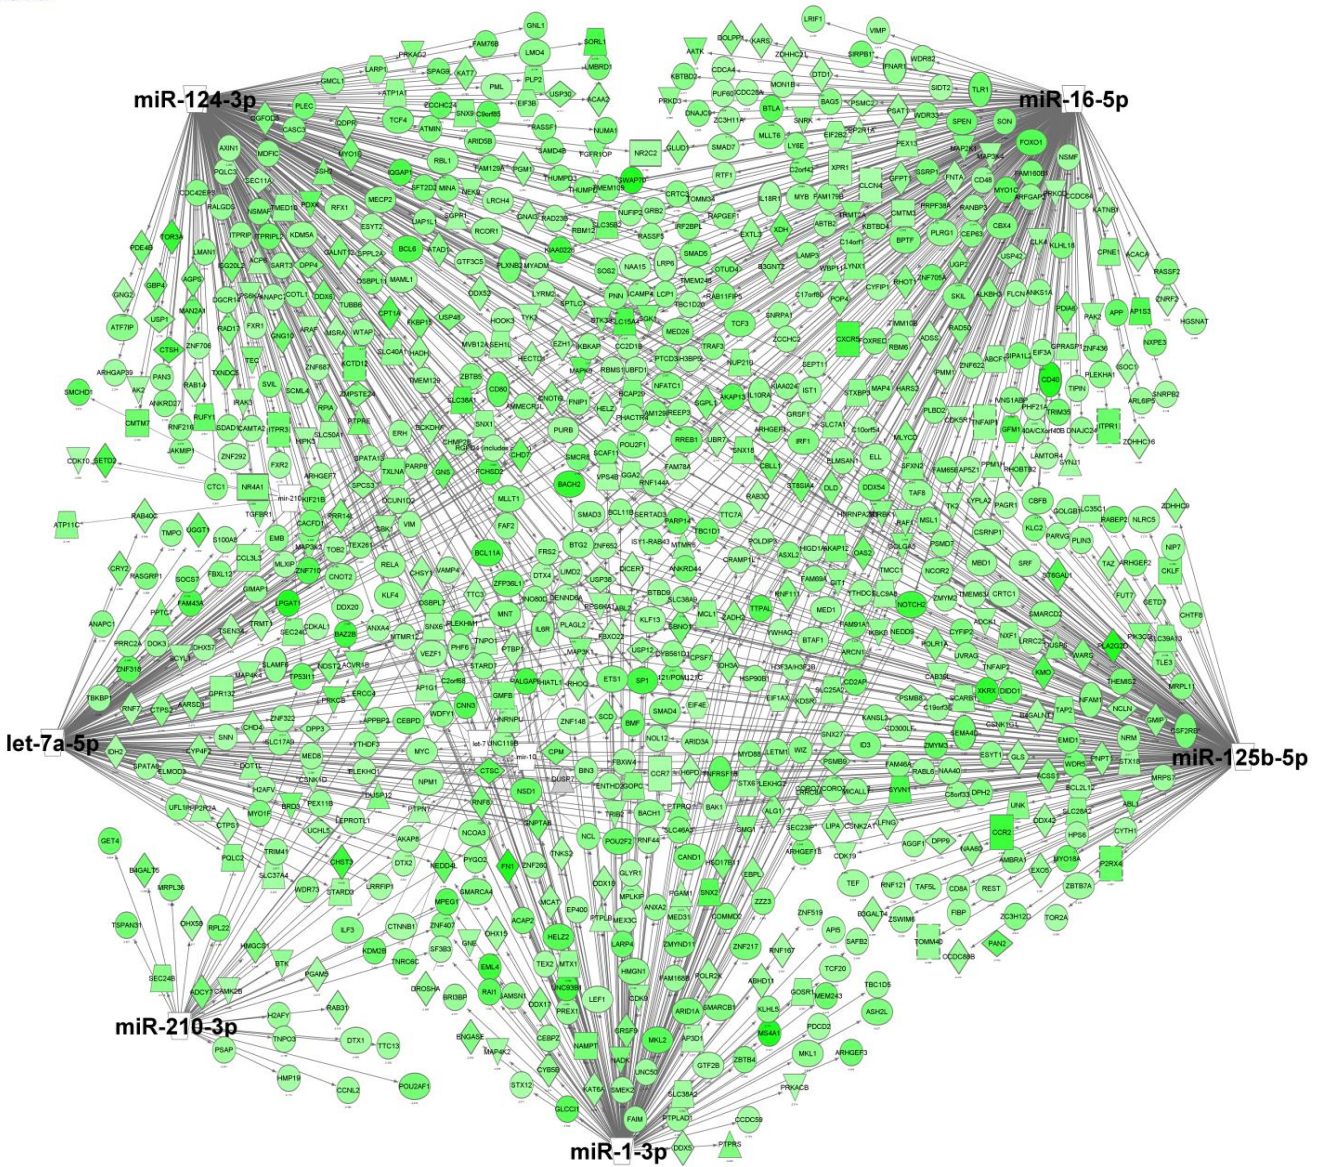

**Additional file 7:** Network of top predicted microRNA and potential target genes. Overlay of colors represent down-regulation of mRNA at day 4.
